# Supplementary material for: Phenotypic Consequences of Copy Number Variation: Insights from Smith-Magenis and Potocki-Lupski Syndrome Mouse Models
Source: PubMed Central journal article supplement (PMC2990707; doi:10.1371/journal.pbio.1000543), 2010-11-23

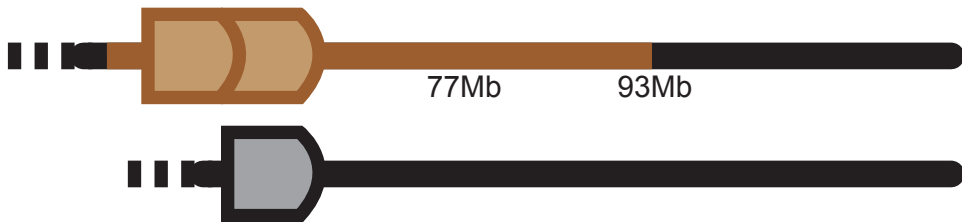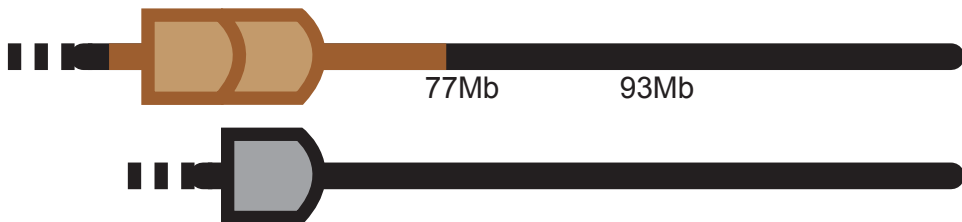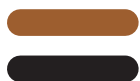

129S5

C57BL/6J

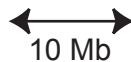

10 Mb

*Akap1*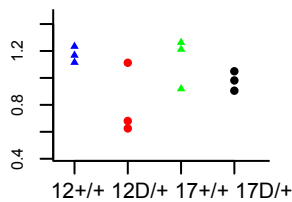*AKO18772*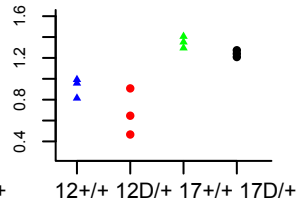*Aldoc*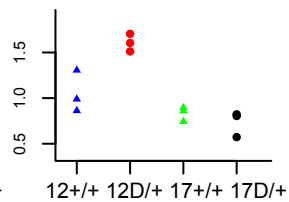*Ccl5*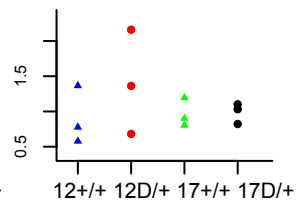*Cuedc1*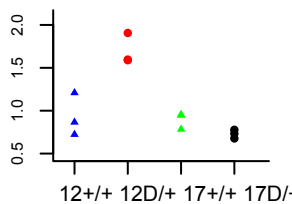*Gdpd1*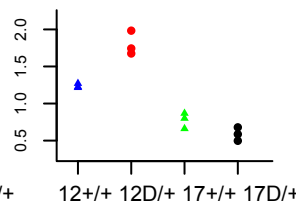*Lhx1*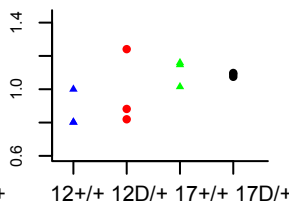*Mrm1*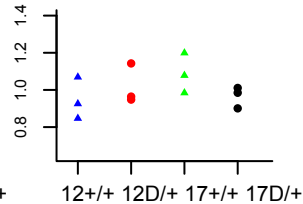*Phf12*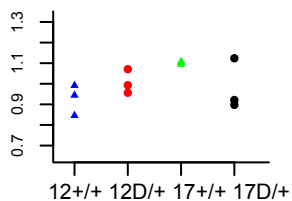*Rffl*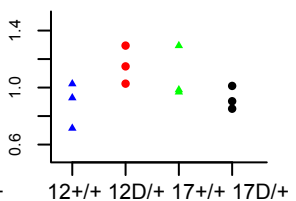*Rnf43*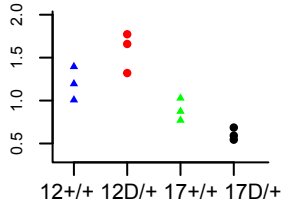*Sept4*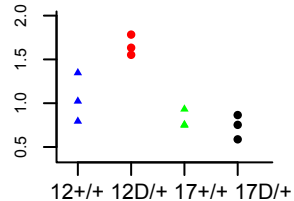*Slc13a2*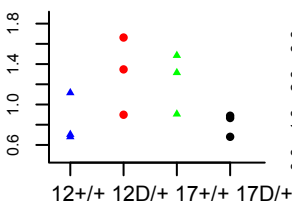*Spag5*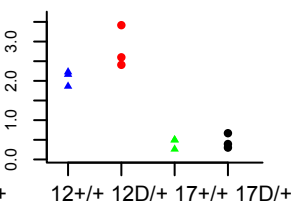*Taf15*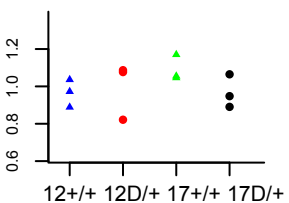*Tmem98*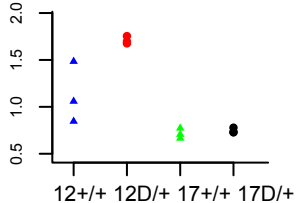

*Akap1*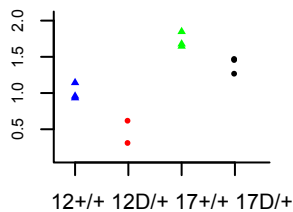*Aldoc*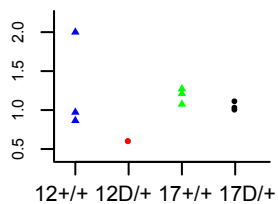*Ccl5*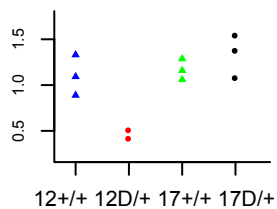*Cuedc1*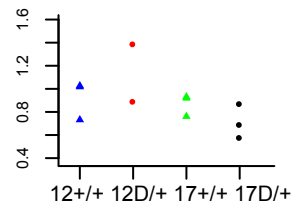*Gdpd1*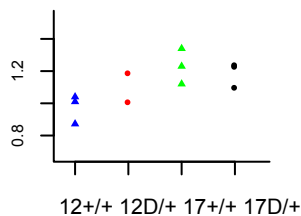*Lhx1*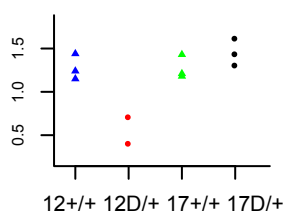*Mrm1*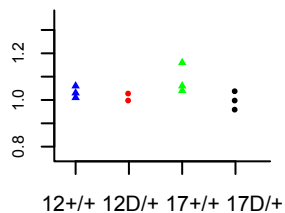*Phf12*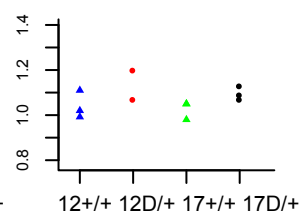*Rffl*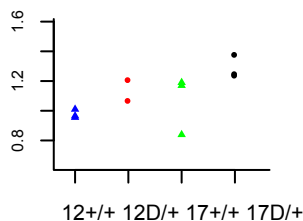*Sept4*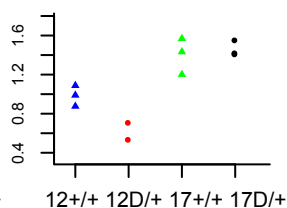*Slc13a2*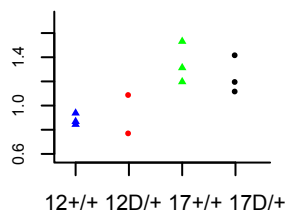*Spag5*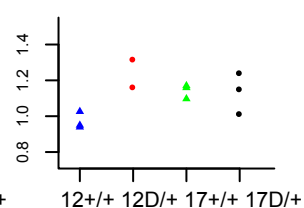*Taf15*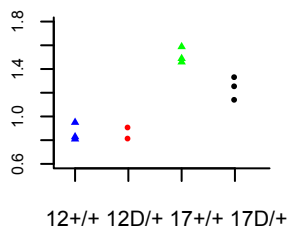*Tmem98*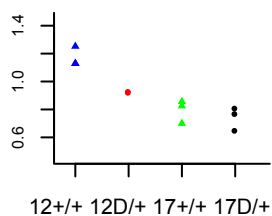

*Akap1*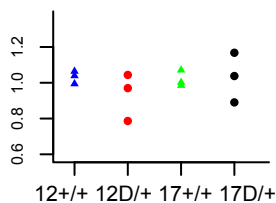*AKO18772*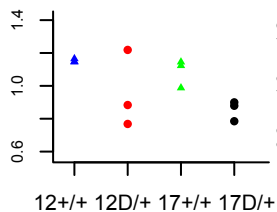*Aldoc*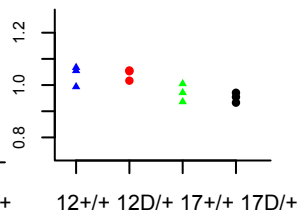*Cuedc1*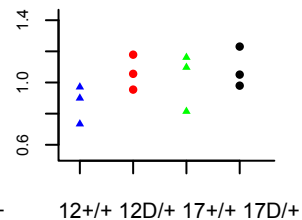*Gdpd1*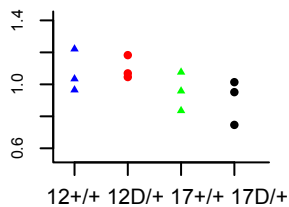*Lhx1*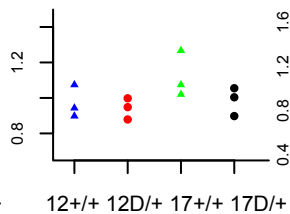*Med13*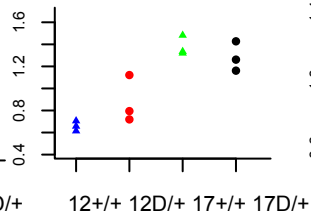*Mrm1*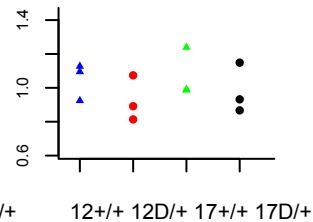*Phf12*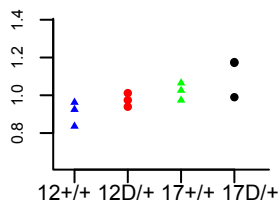*Rffl*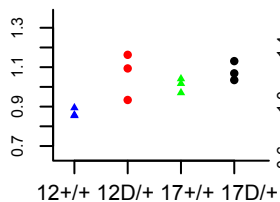*Rnf43*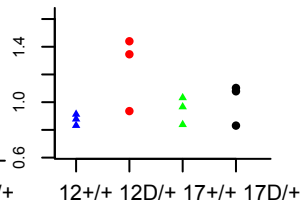*Sept4*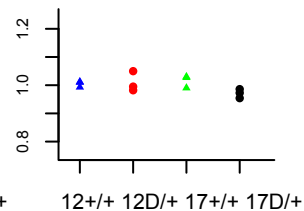*Spag5*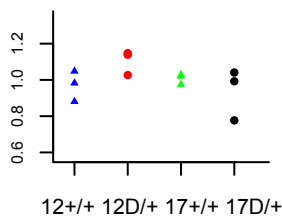*Taf15*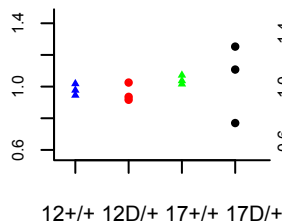*Tmem98*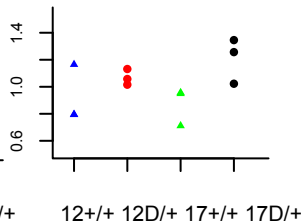*Ypel2*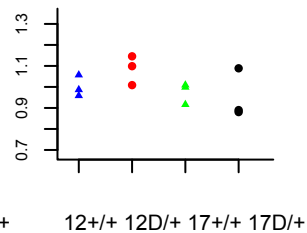

Supplement: pbio.1000543.s006.pdf [file pbio.1000543.s006.pdf]
