# Supplementary material for: Phenotypic Consequences of Copy Number Variation: Insights from Smith-Magenis and Potocki-Lupski Syndrome Mouse Models
Source: PubMed Central journal article supplement (PMC2990707; doi:10.1371/journal.pbio.1000543), 2010-11-23

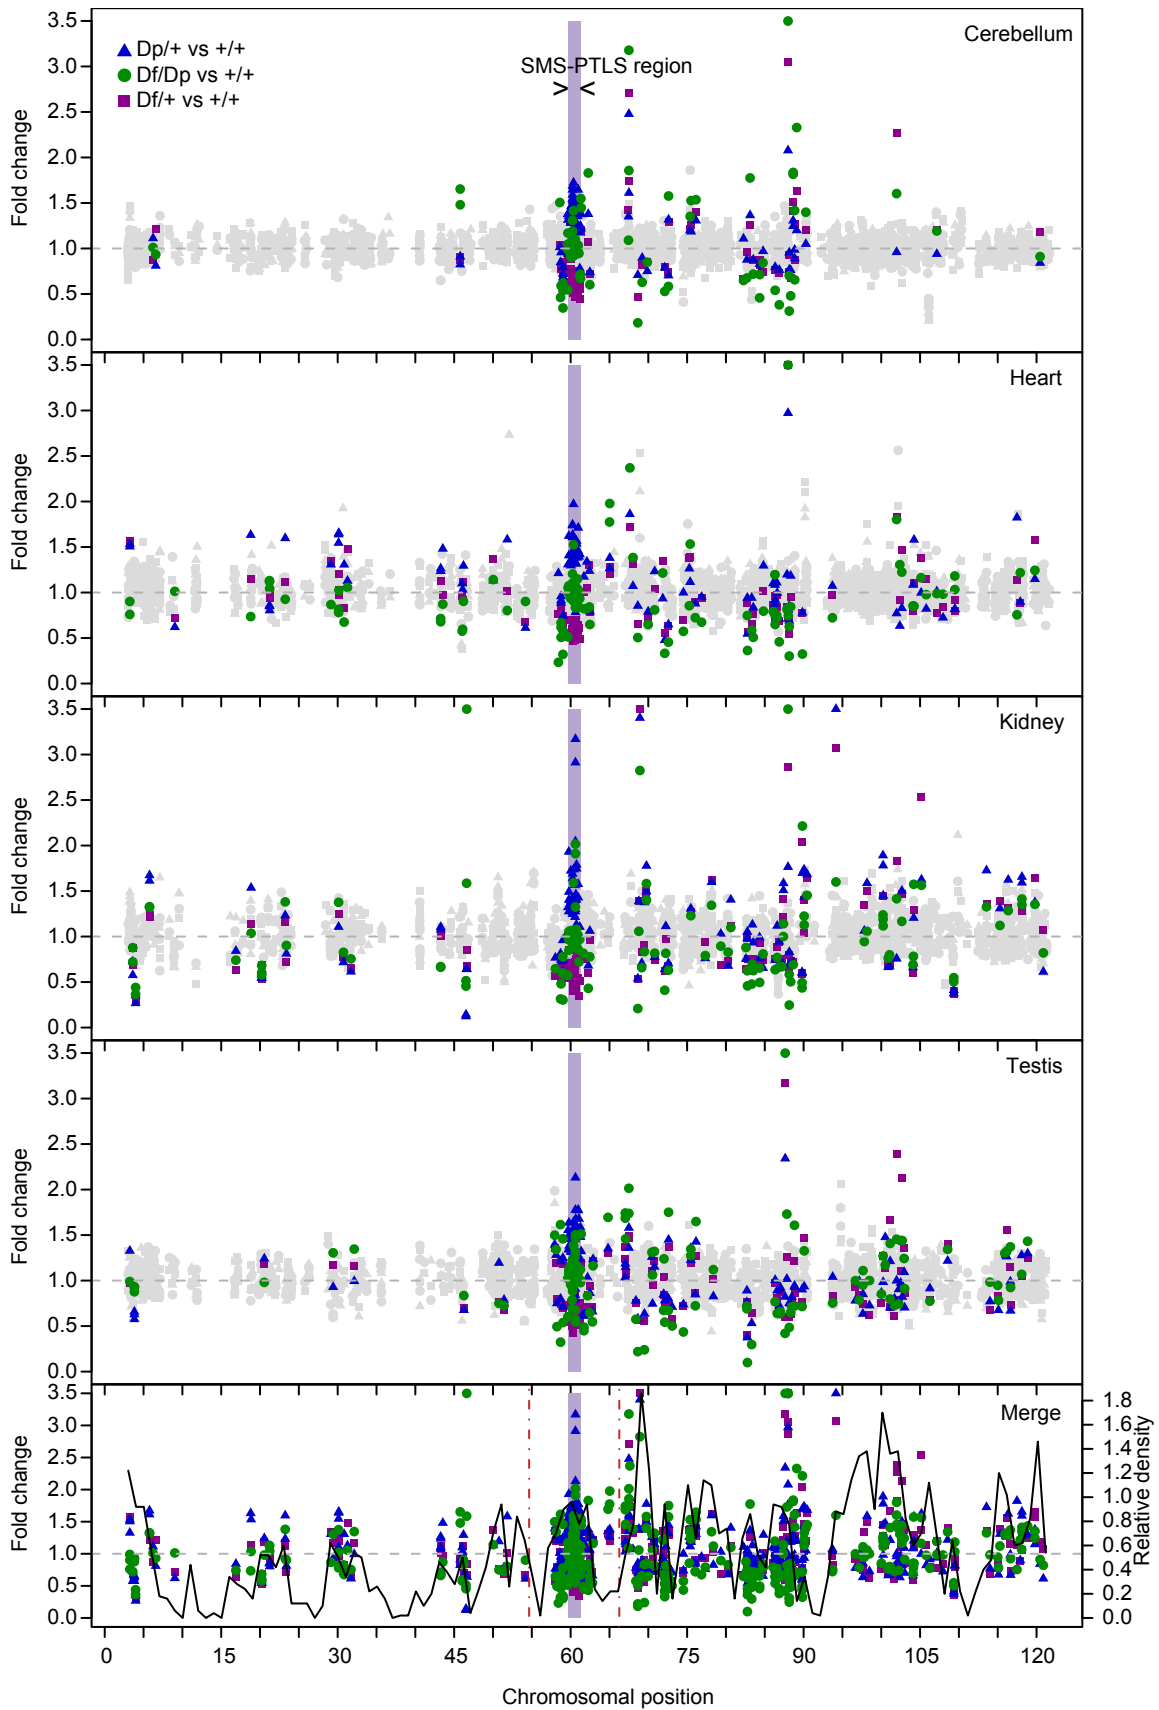

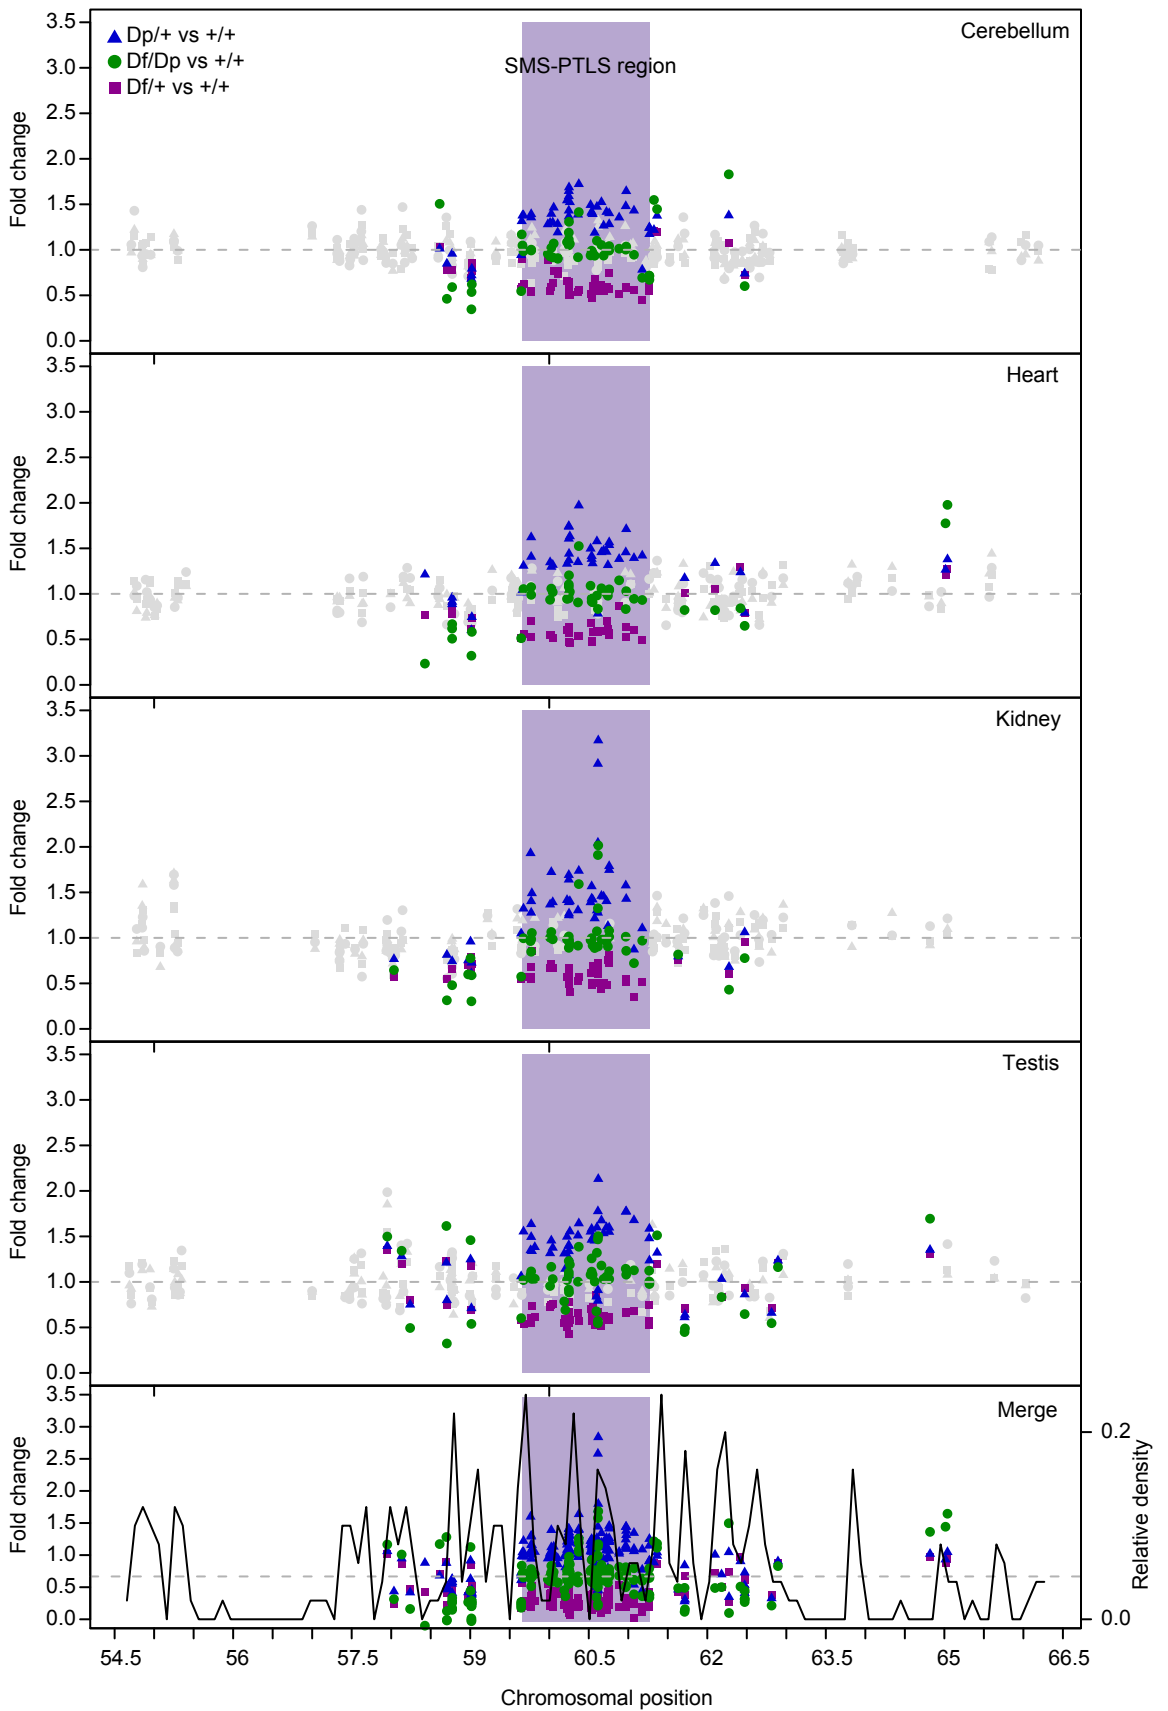

Supplement: pbio.1000543.s009.pdf [file pbio.1000543.s009.pdf]
